# Supplementary material for: From rookeries to foraging grounds: understanding regional connectivity and genetic diversity in hawksbill turtles
Source: Frontiers journal article supplement (doi:10.3389/fmars.2023.1201009), 2023-08-08
Supplement: Table_1.docx [file Table_1.docx]

From Rookeries to Foraging Grounds: Understanding Regional Connectivity and Genetic Diversity in Hawksbill Turtles

**Christine A. Madden Hof 1/2/*, Amelia A. Desbiens 3, Jeff Kinch 4, Nancy N. Fitzsimmons 5, Hayley Versace 6, Angelique Amon 7, Nathan McIntyre 5, Kathy A. Townsend 1, Michael P. Jensen 8/2/5**

1 University of the Sunshine Coast, School of Science, Technology and Engineering, Sippy Downs, Queensland, Australia

2 World Wide Fund for Nature, Healthy Land and Seascapes, Brisbane, Queensland, Australia

3 University of Queensland, Marine Spatial Ecology Lab, School of Biological Sciences, St Lucia, Queensland, Australia

4 Food and Agriculture Organisation of the United Nations, Sub-regional Office for the Pacific, Apia, Samoa

5 Australian Rivers Institute, Griffith University, Nathan, Queensland, Australia

6 The Coral Islands Limited, Panasesa Island, Papua New Guinea

7 Lissenung Resort Island, Kavieng, Papua New Guinea

8 Aalborg University, Department of Chemistry and Bioscience, Aalborg, Denmark.

***Correspondence:** Corresponding author: [chof@wwf.org.au](mailto:chof@wwf.org.au)

**Table S1.** Sample information for all genetics samples collected in the study. Shaded haplotypes boxes show samples removed from analysis.

| **Country** | **Region** | **Location** | **Species** | **Activity** | **Haplotype** | **Genetic ID** | **Date** | **Age Class** | **Notes** |
| --- | --- | --- | --- | --- | --- | --- | --- | --- | --- |
| Papua New Guinea | Conflict Islands | Aroroa Island | hawksbill | Nesting | EiIP-33 | PNG-39 | 12/25/2017 | Adult |  |
| Papua New Guinea | Conflict Islands | Aroroa Island | hawksbill | Nesting | EiIP-34 | PNG-46 | 1/2/2018 | Adult |  |
| Papua New Guinea | Conflict Islands | Aroroa Island | hawksbill | Nesting | EiIP-59 | PNG-61 | 1/7/2018 | Adult |  |
| Papua New Guinea | Conflict Islands | Aroroa Island | hawksbill | Nesting | EiIP-33 | F1525 | 1/8/2020 | Adult |  |
| Papua New Guinea | Conflict Islands | Baden Island | hawksbill | Nesting | EiIP-93 | PNG-47 | 1/3/2018 | Adult |  |
| Papua New Guinea | Conflict Islands | Gabugabutau | hawksbill | Nesting | EiIP-33 | PNG-74 | 11/17/2018 | Adult |  |
| Papua New Guinea | Conflict Islands | Irai Island | hawksbill | Nesting | EiIP-33 | PNG-38 | 12/23/2017 | Adult |  |
| Papua New Guinea | Conflict Islands | Irai Island | hawksbill | Nesting | EiIP-33 | PNG-66 | 1/31/2018 | Adult |  |
| Papua New Guinea | Conflict Islands | Irai Island | hawksbill | Nesting | EiIP-33 | PNG-97 | 11/12/2018 | Adult |  |
| Papua New Guinea | Conflict Islands | Irai Island | hawksbill | Nesting | EiIP-09 | PNG-73 | 12/7/2018 | Adult |  |
| Papua New Guinea | Conflict Islands | Irai Island | hawksbill | Nesting | EiIP-33 | PNG-99 | 12/12/2018 | Adult |  |
| Papua New Guinea | Conflict Islands | Irai Island | hawksbill | Nesting | EiIP-33 | PNG-91 | 12/17/2018 | Adult |  |
| Papua New Guinea | Conflict Islands | Kolavia Island | hawksbill | Nesting | EiIP-33 | PNG-31 | 12/7/2017 | Adult |  |
| Papua New Guinea | Conflict Islands | Kolavia Island | hawksbill | Nesting | EiIP-33 | PNG-37 | 12/22/2017 | Adult |  |
| Papua New Guinea | Conflict Islands | Lachlan Island | hawksbill | Nesting | EiIP-93 | PNG-33 | 12/21/2017 | Adult |  |
| Papua New Guinea | Conflict Islands | Muniara Island | hawksbill | Nesting | EiIP-33 | PNG-44 | 1/2/2018 | Adult |  |
| Papua New Guinea | Conflict Islands | Muniara Island | hawksbill | Nesting | EiIP-33 | PNG-45 | 1/2/2018 | Adult |  |
| Papua New Guinea | Conflict Islands | Muniara Island | hawksbill | Nesting | EiIP-34 | PNG-127 | 12/20/2018 | Adult |  |
| Papua New Guinea | Conflict Islands | Panaboal Island | hawksbill | Nesting | EiIP-59 | PNG-95 | 12/16/2018 | Adult |  |
| Papua New Guinea | Conflict Islands | Panaboal Island | hawksbill | Nesting | EiIP-33 | PNG-118 | 12/26/2018 | Adult |  |
| Papua New Guinea | Conflict Islands | Panarakuum Island | hawksbill | Nesting | EiIP-114 | PNG-35 | 12/22/2017 | Adult |  |
| Papua New Guinea | Conflict Islands | Panarakuum Island | hawksbill | Nesting | EiIP-33 | PNG-36 | 12/22/2017 | Adult |  |
| Papua New Guinea | Conflict Islands | Panarakuum Island | hawksbill | Nesting | EiIP-33 | PNG-63 | 1/16/2018 | Adult |  |
| Papua New Guinea | Conflict Islands | Panarakuum Island | hawksbill | Nesting | EiIP-33 | PNG-64 | 1/20/2018 | Adult |  |
| Papua New Guinea | Conflict Islands | Panarakuum Island | hawksbill | Nesting | EiIP-33 | PNG-65 | 1/20/2018 | Adult |  |
| Papua New Guinea | Conflict Islands | Panarakuum Island | hawksbill | Nesting | EiIP-33 | PNG-123 | 11/26/2018 | Adult |  |
| Papua New Guinea | Conflict Islands | Panarakuum Island | hawksbill | Nesting | EiIP-33 | PNG-96 | 11/27/2018 | Adult |  |
| Papua New Guinea | Conflict Islands | Panarakuum Island | hawksbill | Nesting | EiIP-34 | PNG-72 | 12/16/2018 | Adult |  |
| Papua New Guinea | Conflict Islands | Panarakuum Island | hawksbill | Nesting | EiIP-33 | PNG-84 | 12/21/2018 | Adult |  |
| Papua New Guinea | Conflict Islands | Panasesa Island | hawksbill | Nesting | EiIP-33 | PNG-130 | 12/24/2018 | Adult |  |
| Papua New Guinea | Conflict Islands | Panasesa Island | hawksbill | Nesting | EiIP-33 | PNG-149 | 2/2/2019 | Adult |  |
| Papua New Guinea | Conflict Islands | Panasesa Island | hawksbill | Nesting | EiIP-33 | F1527 | 1/11/2020 | Adult |  |
| Papua New Guinea | Conflict Islands | Tupit Island | hawksbill | Nesting | EiIP-33 | PNG-78 | 11/21/2018 | Adult |  |
| Papua New Guinea | Conflict Islands | Tupit Island | hawksbill | Nesting | EiIP-33 | PNG-70 | 12/23/2018 | Adult |  |
| Papua New Guinea | Conflict Islands | Tupit Island | hawksbill | Nesting | EiIP-33 | PNG-92 | 12/23/2018 | Adult |  |
| Papua New Guinea | Conflict Islands | Tupit Island | hawksbill | Nesting | EiIP-33 | PNG-128 | 1/10/2019 | Adult |  |
| Papua New Guinea | Conflict Islands | Tupit Island | hawksbill | Nesting | EiIP-33 | PNG-82 | 1/13/2019 | Adult |  |
| Papua New Guinea | Conflict Islands | Tupit Island | hawksbill | Nesting | EiIP-33 | PNG-119 | 1/30/2019 | Adult |  |
| Papua New Guinea | Conflict Islands | Tupit Island | hawksbill | Nesting | EiIP-33 | F1526 | 1/24/2020 | Adult |  |
| Papua New Guinea | New Ireland | Edmago Island | hawksbill | Nesting | **EiIP-64** | NIP-07 | 1/27/2015 | Hatchling | Sample excluded from analysis because the nest could be from the same female nesting on 1/9/2015. |
| Papua New Guinea | New Ireland | Edmago Island | hawksbill | Nesting | **EiIP-64** | NIP-11a | 12/27/2015 | Hatchling | Sample excluded from analysis because the nest could be from the same female nesting on 1/9/2015. |
| Papua New Guinea | New Ireland | Edmago Island | hawksbill | Nesting | EiIP-33 | NIP-01 | 1/8/2016 | Hatchling |  |
| Papua New Guinea | New Ireland | Edmago Island | hawksbill | Nesting | **EiIP-39** | NIP-12 | 2/13/2017 | Hatchling | Sample excluded from analysis because the nest could be from the same female nesting on 1/9/2015. |
| Papua New Guinea | New Ireland | Edmago Island | hawksbill | Nesting | EiIP-64 | NIP-20 | 3/24/2017 | Hatchling |  |
| Papua New Guinea | New Ireland | Edmago Island | hawksbill | Nesting | **EiIP-64** | NIP-57 | 4/5/2017 | Hatchling | Sample excluded from analysis because the nest could be from the same female nesting on 3/24/2017. |
| Papua New Guinea | New Ireland | Edmago Island | hawksbill | Nesting | EiIP-59 | NIP-68 | 4/8/2018 | Hatchling |  |
| Papua New Guinea | New Ireland | Edmago Island | hawksbill | Nesting | EiIP-64 | F2067 | 1/14/2021 | Hatchling |  |
| Papua New Guinea | New Ireland | Lissenung Island | hawksbill | Nesting | EiIP-33 | NIP-45 | 5/5/2016 | Hatchling |  |
| Papua New Guinea | New Ireland | Lissenung Island | hawksbill | Nesting | EiIP-33 | NIP-46a | 7/5/2016 | Hatchling |  |
| Papua New Guinea | New Ireland | Lissenung Island | hawksbill | Nesting | EiIP-64 | NIP-10 | 12/5/2016 | Hatchling |  |
| Papua New Guinea | New Ireland | Ral Island | hawksbill | Nesting | EiIP-64 | NIP-06 | 1/9/2015 | Hatchling |  |
| Papua New Guinea | New Ireland | Ral Island | hawksbill | Nesting | EiIP-33 | NIP-08 | 1/25/2015 | Hatchling |  |
| Papua New Guinea | New Ireland | Ral Island | hawksbill | Nesting | EiIP-64 | NIP-21 | 2/13/2015 | Hatchling |  |
| Papua New Guinea | New Ireland | Ral Island | hawksbill | Nesting | EiIP-39 | NIP-31 | 3/14/2015 | Hatchling |  |
| Papua New Guinea | New Ireland | Ral Island | hawksbill | Nesting | EiIP-64 | NIP-19 | 1/15/2016 | Hatchling |  |
| Papua New Guinea | New Ireland | Ral Island | hawksbill | Nesting | EiIP-33 | NIP-22 | 1/30/2016 | Hatchling |  |
| Papua New Guinea | New Ireland | Ral Island | hawksbill | Nesting | EiIP-59 | NIP-24 | 2/4/2016 | Hatchling |  |
| Papua New Guinea | New Ireland | Ral Island | hawksbill | Nesting | EiIP-59 | NIP-25 | 2/5/2016 | Hatchling |  |
| Papua New Guinea | New Ireland | Ral Island | hawksbill | Nesting | EiIP-150 | NIP-28 | 2/17/2016 | Hatchling |  |
| Papua New Guinea | New Ireland | Ral Island | hawksbill | Nesting | EiIP-64 | NIP-29 | 2/17/2016 | Hatchling |  |
| Papua New Guinea | New Ireland | Ral Island | hawksbill | Nesting | EiIP-64 | NIP-30 | 2/22/2016 | Hatchling |  |
| Papua New Guinea | New Ireland | Ral Island | hawksbill | Nesting | EiIP-59 | NIP-34 | 3/2/2016 | Hatchling |  |
| Papua New Guinea | New Ireland | Ral Island | hawksbill | Nesting | EiIP-59 | NIP-39 | 3/26/2016 | Hatchling |  |
| Papua New Guinea | New Ireland | Ral Island | hawksbill | Nesting | EiIP-59 | NIP-40 | 3/31/2016 | Hatchling |  |
| Papua New Guinea | New Ireland | Ral Island | hawksbill | Nesting | EiIP-59 | NIP-02a | 11/12/2016 | Hatchling |  |
| Papua New Guinea | New Ireland | Ral Island | hawksbill | Nesting | EiIP-33 | NIP-13 | 2/21/2017 | Hatchling |  |
| Papua New Guinea | New Ireland | Ral Island | hawksbill | Nesting | EiIP-59 | NIP-14 | 3/2/2017 | Hatchling |  |
| Papua New Guinea | New Ireland | Ral Island | hawksbill | Nesting | **EiIP-33** | NIP-15 | 3/4/2017 | Hatchling | Sample excluded from analysis because the nest could be from the same female nesting on 2/21/2017 [11 days]. |
| Papua New Guinea | New Ireland | Ral Island | hawksbill | Nesting | EiIP-64 | NIP-16 | 3/6/2017 | Hatchling |  |
| Papua New Guinea | New Ireland | Ral Island | hawksbill | Nesting | **EiIP-59** | NIP-17 | 3/12/2017 | Hatchling | Sample excluded from analysis because the nest could be from the same female nesting on 3/2/2017. |
| Papua New Guinea | New Ireland | Ral Island | hawksbill | Nesting | **EiIP-33** | NIP-18 | 3/18/2017 | Hatchling | Sample excluded from analysis because the nest could be from the same female nesting on 2/21/2017. |
| Papua New Guinea | New Ireland | Ral Island | hawksbill | Nesting | **EiIP-64** | NIP-53 | 3/21/2017 | Hatchling | Sample excluded from analysis because the nest could be from the same female nesting on 6/3/2017. |
| Papua New Guinea | New Ireland | Ral Island | hawksbill | Nesting | **EiIP-33** | NIP-54 | 4/3/2017 | Hatchling | Sample excluded from analysis because the nest could be from the same female nesting on 2/21/2017. |
| Papua New Guinea | New Ireland | Ral Island | hawksbill | Nesting | EiIP-150 | NIP-26 | 4/6/2017 | Hatchling |  |
| Papua New Guinea | New Ireland | Ral Island | hawksbill | Nesting | **EiIP-33** | NIP-56 | 4/15/2017 | Hatchling | Sample excluded from analysis because the nest could be from the same female nesting on 2/21/2017. |
| Papua New Guinea | New Ireland | Ral Island | hawksbill | Nesting | EiIP-59 | NIP-59 | 11/19/2017 | Hatchling |  |
| Papua New Guinea | New Ireland | Ral Island | hawksbill | Nesting | EiIP-33 | NIP-60 | 12/9/2017 | Hatchling |  |
| Papua New Guinea | New Ireland | Ral Island | hawksbill | Nesting | EiIP-33 | NIP-58 | 12/11/2017 | Hatchling |  |
| Papua New Guinea | New Ireland | Ral Island | hawksbill | Nesting | **EiIP-33** | NIP-61 | 12/25/2017 | Hatchling | Sample excluded from analysis because the nest could be from the same female nesting on 1/9/2015. |
| Papua New Guinea | New Ireland | Ral Island | hawksbill | Nesting | EiIP-64 | NIP-63 | 1/21/2018 | Hatchling |  |
| Papua New Guinea | New Ireland | Ral Island | hawksbill | Nesting | EiIP-33 | NIP-64 | 1/22/2018 | Hatchling |  |
| Papua New Guinea | New Ireland | Ral Island | hawksbill | Nesting | EiIP-64 | NIP-65a | 1/26/2018 | Hatchling |  |
| Papua New Guinea | New Ireland | Ral Island | hawksbill | Nesting | **EiIP-64** | NIP-66a | 2/6/2018 | Hatchling | Sample excluded from analysis because the nest could be from the same female nesting on 1/26/2018. |
| Papua New Guinea | New Ireland | Ral Island | hawksbill | Nesting | EiIP-64 | NIP-67 | 2/26/2018 | Hatchling |  |
| Papua New Guinea | New Ireland | Ral Island | hawksbill | Nesting | EiIP-64 | F2071 | 11/27/2020 | Hatchling |  |
| Papua New Guinea | New Ireland | Ral Island | hawksbill | Nesting | EiIP-33 | F2064 | 11/30/2020 | Hatchling |  |
| Papua New Guinea | New Ireland | Ral Island | hawksbill | Nesting | EiIP-64 | F2063 | 12/25/2020 | Hatchling |  |
| Papua New Guinea | New Ireland | Ral Island | hawksbill | Nesting | EiIP-59 | F2065 | 1/10/2021 | Hatchling |  |
| Papua New Guinea | New Ireland | Ral Island | hawksbill | Nesting | **EiIP-59** | F2068 | 1/26/2021 | Hatchling | Sample excluded from analysis because the nest could be from the same female nesting on 1/10/2021. |
| Papua New Guinea | New Ireland | Ral Island | hawksbill | Nesting | **EiIP-59** | F2069 | 2/12/2021 | Hatchling | Sample excluded from analysis because the nest could be from the same female nesting on 1/10/2021. |
| Papua New Guinea | New Ireland | Ral Island | hawksbill | Nesting | EiIP-64 | F2072 | 2/23/2021 | Hatchling |  |
| Papua New Guinea | New Ireland | Ral Island | hawksbill | Nesting | EiIP-33 | F2073 | 3/30/2021 | Hatchling |  |
| Papua New Guinea | New Ireland | Unknown | hawksbill | Nesting | EiIP-64 | NIP-32 | 2/22/2016 | Hatchling |  |
| Papua New Guinea | New Ireland | Unknown | hawksbill | Nesting | EiIP-33 | NIP-41 | 4/2/2016 | Hatchling |  |
| Papua New Guinea | New Ireland | Unknown | hawksbill | Nesting | EiIP-64 | NIP-55 | Unknown | Hatchling |  |

**Table S2. Haplotype frequencies for Asia-Pacific hawksbill turtle management units. Haplotype designations indicate previous and new EilP names and GenBank references for the sequences. References (in order as shown) are: # Nishizawa et al. 2016; ^Vargas et al., 2016; * Wahidah et al. 2009;▲LaCasella et al. 2022;** ♠**This study)**


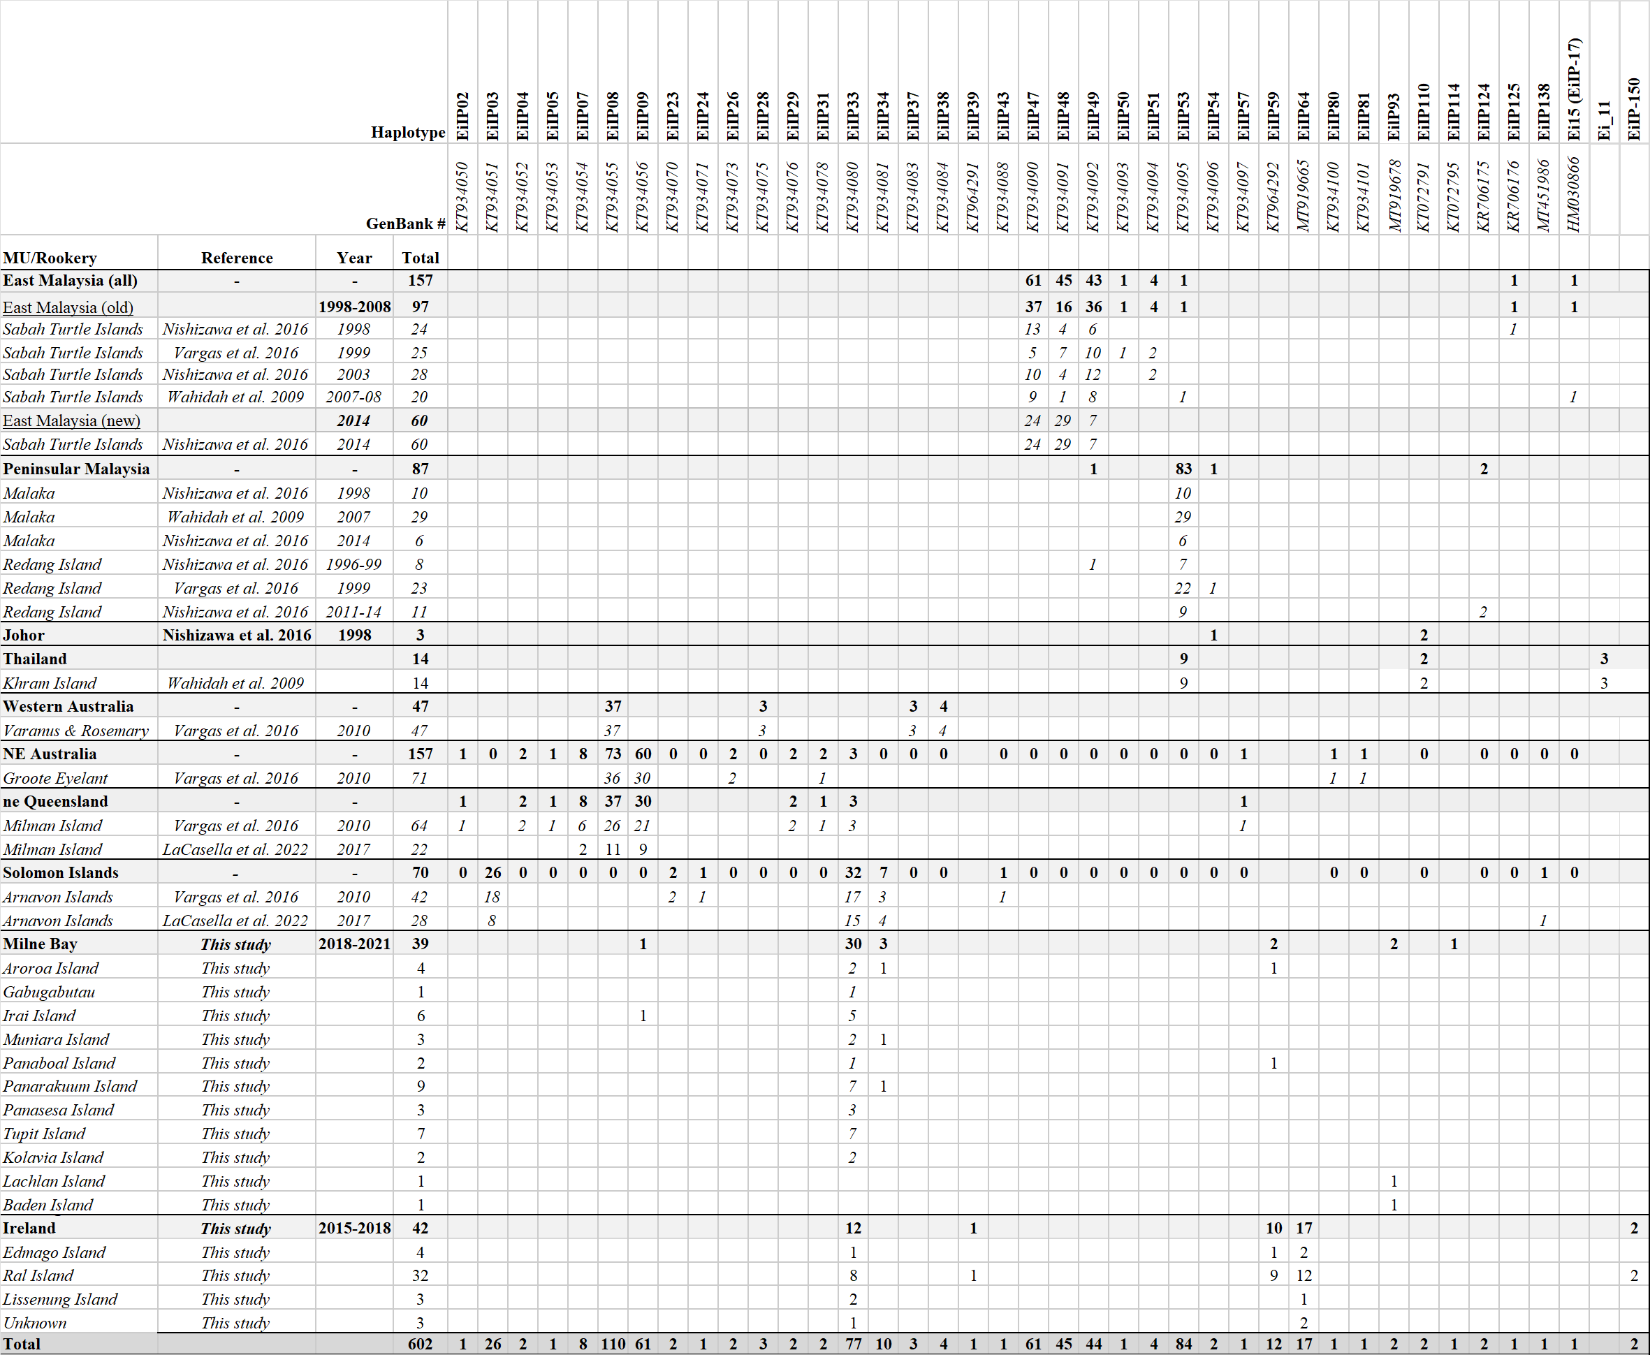


**Table S3.** The table summarizes sample sizes, and haplotype counts , nucleotide and haplotype diversities, for samples collected from different hawksbill (*Eretmochelys imbricata*) Management Units using approximately 770 base pairs of the mitochondrial DNA control region. haplotype diversity (Hd) and Nucleotide diversity (π) were calculated to assess genetic diversity, and the number of unique haplotypes found in each location was determined.

| Country/Location |  | Location | Samples Size | Haplotypes | Hd (standard deviation) | π (standard deviation) | Reference |  |
| --- | --- | --- | --- | --- | --- | --- | --- | --- |
| *Malaysia old* |  |  | 97 | 8 | 0.6946 (+/- 0.0244) | 0.018504 (+/- 0.009269) |  |  |
| *Malaysia new* |  |  | 60 | 3 | 0.6028 (+/- 0.0311) | 0.017479 (+/- 0.008839) |  |  |
| *Peninsular Malaysia* |  |  | 87 | 4 | 0.0901 (+/- 0.0421) | 0.000267 (+/- 0.000368) |  |  |
| *Western Australia* |  |  | 47 | 4 | 0.3728 (+/- 0.0857) | 0.001674 (+/- 0.001188) |  |  |
| *Arnhemland* |  |  | 71 | 6 | 0.5710 (+/- 0.0304) | 0.019248 (+/- 0.009661) |  |  |
| *Milman Island* |  |  | 86 | 10 | 0.6897 (+/- 0.0325) | 0.019943 (+/- 0.009969) |  |  |
| *Arnavons* |  |  | 70 | 7 | 0.6509 (+/- 0.0344) | 0.001753 (+/- 0.001220) |  |  |
| *Conflict Islands* |  |  | 39 | 6 | 0.4062 (+/- 0.0969) | 0.002629 (+/- 0.001680) | This study |  |
| *Kavieng* |  |  | 42 | 5 | 0.7120 (+/- 0.0346) | 0.001376 (+/- 0.001035) | This study |  |

**Table S4.** Summary of the 16 hawksbill turtles satellite tagged during 2017-2018 and 2018-2019 nesting seasons at the Conflict Group. P = Primary, first time tagged, WSR = within season recapture, CCL = curved carapace length (max length, cm), CCW = curved carapace width, L = laid, X = no lay.

| **PTT** | **Primary tag number** | **Tag status** | **Nesting season year tagged** | **Capture date** | **Nesting Island** | **Nest Latitude** | **Nest Longitude** | **CCL (cm)** | **CCW (cm)** | **Nesting activity** | **Egg count** |
| --- | --- | --- | --- | --- | --- | --- | --- | --- | --- | --- | --- |
| 49861 [Boss Meri] | IGS0586 | P | 2017 | 20/01/2018 | Panarakuum | -10.77072 | 151.85168 | 79.3 | n/a | X | n/a |
| 49863 [Koyo] | IGS0601 | P | 2017 | 16/01/2018 | Panarakuum | -10.76789 | 151.86184 | 80.5 | 73 | L | 154 |
| 49864 [JC] | IGS0816 | P | 2018 | 2/01/2019 | Panarakuum | -10.76770 | 151.86168 | 81 | n/a | L | n/a |
| 49866 [Steve] | R56619 | WSR | 2018 | 30/12/2018 | Tupit | -10.71955 | 151.74823 | 77.5 | n/a | X | n/a |
| 49867 [Lexi] | IGS0801 | P | 2017 | 7/01/2018 | Aroroa | n/a | n/a | 84.4 | 76 | X | n/a |
| 49868 [Mito] | IGS0167 | P | 2018 | 4/01/2019 | Irai | -10.76682 | 151.68625 | 82 | 75 | L | 100 |
| 49869 [Conflict] | IGS0954 | P | 2017 | 5/01/2018 | Kolavia | -10.78090 | 151.88191 | 80.3 | n/a | X | n/a |
| 49870 [Mose] | IGS0184 | WSR | 2018 | 30/12/2018 | Panasesa | n/a | n/a | 86.3 | n/a | L | n/a |
| 49871 [Sally] | IGS0165 | P | 2018 | 4/01/2019 | Irai | -10.76679 | 151.68614 | 79.3 | 72 | L | 90 |
| 49872 [Luke] | IGS0558 | P | 2017 | 10/01/2018 | Tupit | -10.71968 | 151.74809 | 79.5 | 66.1 | X | n/a |
| 49891 [Jonathan] | IGS0542 | P | 2017 | 2/01/2018 | Aroroa | n/a | n/a | 83.4 | 70.8 | X | n/a |
| 49897 [Lenny] | IGS0684 | P | 2017 | 2/01/2018 | Muniara | -10.79905 | 151.89865 | 81.4 | n/a | L | 152 |
| 49900 [Georgey] | IGS0244 | WSR | 2017 | 3/01/2018 | Baden | -10.36773 | 151.38085 | 81.3 | n/a | L [Attempted to nest on Lachlan Island 21/12/17, no lay] | 147 |
| 49903 [Steven] | IGS0792 | WSR | 2017 | 31/12/2017 | Irai | -10.76601 | 151.6971 | 80.1 | n/a | X  [Attempted to nest on Panasesa 15/12/17, no lay] | n/a |
| 49917 [Thomas] | IGS0567 | P | 2017 | 2/01/2018 | Muniara | -10.80005 | 151.89883 | 82 | 73.5 | L | n/a |
| 49918 [Plj] | R56606 | WSR | 2018 | 5/01/2019 | Tupit | -10.72066 | 151.74951 | 75.3 | 69 | X [Laid on Tupit Island 21/11/2018] | n/a |
| **mean +/- s.d.** | | | | | | | | **80.85 +/- 2.60** | **71.93 +/- 3.24** |  | |

**Table S5:** Summary of Argos satellite-tracking data, including migratory movements for 15 turtles tagged in 2017-2018. * = calculations pertaining only to turtles tracked to arrival at foraging ground (n = 10).

| **PTT** | **Tracking date range** | **No. tracking days** | **No. tracking locations (filtered)** | **Migration date range** | **No. migration days** | **No. migration locations (filtered)** | **Migration path distance** | **Straight-line migration distance** | **Migration speed (km h-1) ± SE** | **Arrived at foraging grounds** |
| --- | --- | --- | --- | --- | --- | --- | --- | --- | --- | --- |
| 49861 | 11.01.2018 – 28.01.2020 | 747 | 1727 | 07.02.2018 – 13.04.2018 | 65 | 170 | 1782 | 871 | 1.42 ± 0.08 | Yes |
| 49863 | 09.01.2018 – 11.04.2018 | 92 | 260 | 01.03.2018 – 11.04.2018 | 41 | 121 | 976 | 609 | 1.19 ± 0.11 | No |
| 49864 | 20.12.2018 – 30.05.2020 | 517 | 1308 | 20.02.2019 – 31.03.2019 | 39 | 153 | 1326 | 996 | 1.73 ± 0.09 | Yes |
| 49866 | 20.12.2018 – 21.02.2019 | 53 | 162 | 03.02.2019 – 21.02.2019 | 18 | 55 | 483 | 155 | 1.61 ± 0.15 | No |
| 49867 | 03.01.2018 – 22.03.2018 | 78 | 213 | 02.03.2018 – 22.03.2018 | 20 | 60 | 1023 | 923 | 2.85 ± 0.19 | No |
| 49868 | 31.12.2018 – 05.04.2019 | 95 | 162 | 08.01.2018 – 01.02.2019 | 24 | 62 | 1020 | 883 | 2.05 ± 0.13 | Yes |
| 49869 | 03.01.2018 – 20.01.2020 | 747 | 1581 | 10.01.2018 – 03.02.2018 | 24 | 64 | 665 | 588 | 1.49 ± 0.12 | Yes |
| 49870 | 20.12.2018 – 08.11.2019 | 313 | 832 | 29.01.2019 – 08.03.2019 | 38 | 115 | 1170 | 817 | 1.36 ± 0.08 | Yes |
| 49871 | 20.12.2018 – 02.08.2019 | 214 | 533 | 12.02.2019 – 11.03.2019 | 27 | 69 | 1021 | 844 | 1.85 ± 0.13 | Yes |
| 49872 | 03.01.2018 – 07.03.2018 | 63 | 179 | 13.02.2018 – 07.03.2018 | 22 | 66 | 537 | 385 | 1.00 ± 0.08 | No |
| 49891 | 31.12.2017 – 15.01.2019 | 380 | 458 | 24.02.2018 – 04.04.2018 | 39 | 89 | 1267 | 876 | 2.06 ± 0.30 | Yes |
| 49900 | 03.01.2018 – 07.03.2018 | 63 | 99 | 07.01.2018 – 02.02.2018 | 26 | 76 | 1016 | 818 | 1.88 ± 0.10 | Yes |
| 49903 | 31.12.2017 – 05.09.2019 | 613 | 1276 | 18.02.2018 – 07.04.2018 | 48 | 170 | 1428 | 891 | 1.43 ± 0.07 | Yes |
| 49917 | 31.12.2017 – 03.02.2019 | 399 | 500 | 19.02.2018 -07.04.2018 | 47 | 160 | 1715 | 960 | 1.71 ± 0.07 | Yes |
| 49918 | 31.12.2018 – 12.04.2019 | 102 | 247 | 22.02.2019 – 12.04.2019 | 49 | 100 | 1451 | 829 | 1.40 ± 0.10 | No |
| **Mean ± SE** | - | **298 ± 66** | **636 ± 145** | - | **38* ± 4** | **113* ± 15** | **1241* ± 108** | **854* ± 35** | **1.67* ± 0.14** | - |
